# Supplementary material
Source: publisher figshare collection journal article supplement (https://diabetesjournals.figshare.com/articles/dataset/_/20359713)
Supplement: Supplementary file 4 [file 1]

| Target          | Forward               | Reverse                 |
|-----------------|-----------------------|-------------------------|
| B2M             | TTCTGGTGCTTGTCTCACTGA | CAGTATGTTCTGGCTTCCCATTC |
| Cav1            | ATGTCTGGGGGCAAATACGTG | CGCGTCATACACTTGCTTCT    |
| Cebp1 $\alpha$  | TGGCCTGGAGACGCAATGA   | CGCAGAGATTGTGCGTCTTT    |
| Perilipin       | GGGACCTGTGAGTGCTTCC   | GTATTGAAGAGCCGGGATCTTTT |
| PPAR $\gamma$ 2 | GCATGGTGCCTTCGCTGA    | TGGCATCTCTGTGTCAACCATG  |
| Lep             | TGACACCAAACCCTCATCA   | AGCCCAGGAATGAAGTCCA     |
