# Supplementary material
Source: publisher figshare collection journal article supplement (https://diabetesjournals.figshare.com/articles/dataset/_/20359713)

Figure S2

A

Top 10 Significantly upregulated pathways

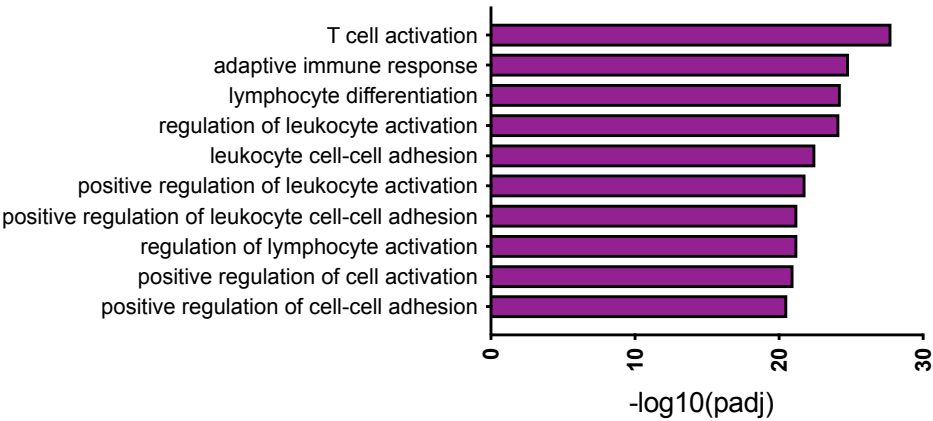

B

Top 10 Significantly downregulated pathways

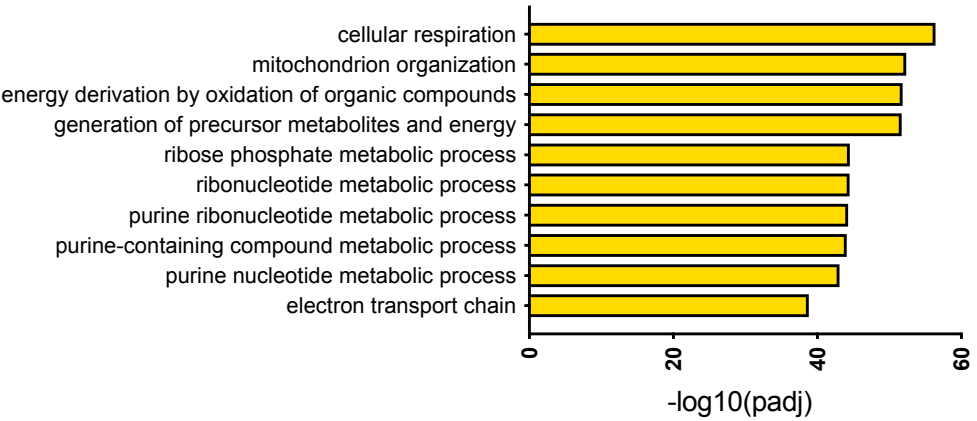

C

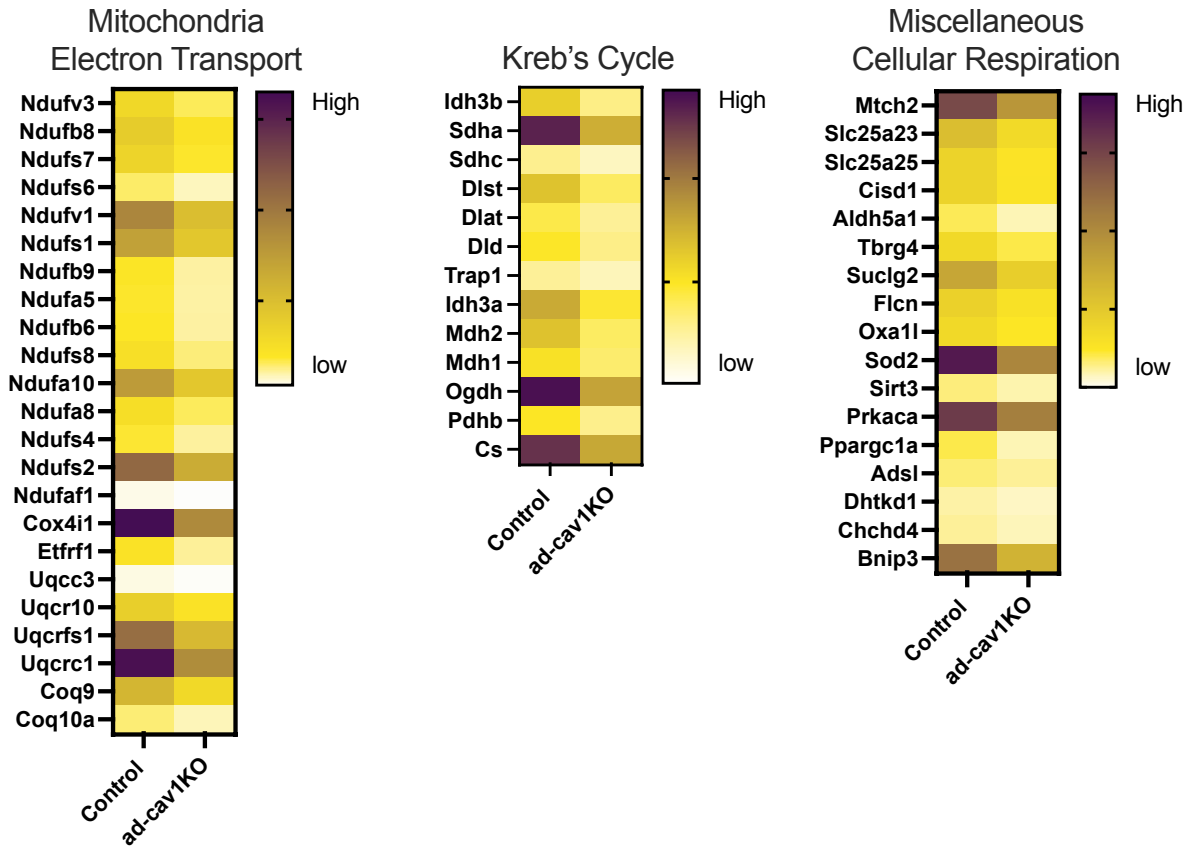

Supplement: Supplementary file 6 [file 1]
