# Supplementary material
Source: publisher figshare collection journal article supplement (https://diabetesjournals.figshare.com/articles/dataset/_/20359713)
Supplement: Supplementary file 10 [file 1]

| Antibody                                  | Source                    | Identifier |
|-------------------------------------------|---------------------------|------------|
| Cav1                                      | Cell Signaling Technology | 3267       |
| Total OXPHOS cocktail                     | Abcam                     | ab110413   |
| Phospho-Akt (Ser473) (D9E) XP® Rabbit mAb | Cell Signaling Technology | 4060T      |
| Akt (pan) (40D4) Mouse mAb                | Cell Signaling Technology | 2920S      |
| GAPDH (D16H11) XP® Rabbit mAb             | Cell Signaling Technology | 5174S      |
| MAC2 (Galectin-3) Clone M3/38             | BioLegend                 | 125401     |
| Perilipin antibody                        | Fitzgerald                | 20R-PP004  |
| Flotillin-1                               | Cell Signaling Technology | 18634T     |
| Histone H3                                | Cell Signaling Technology | 4499T      |
