# Supplementary material
Source: publisher figshare collection journal article supplement (https://diabetesjournals.figshare.com/articles/dataset/_/20359713)

Figure S7

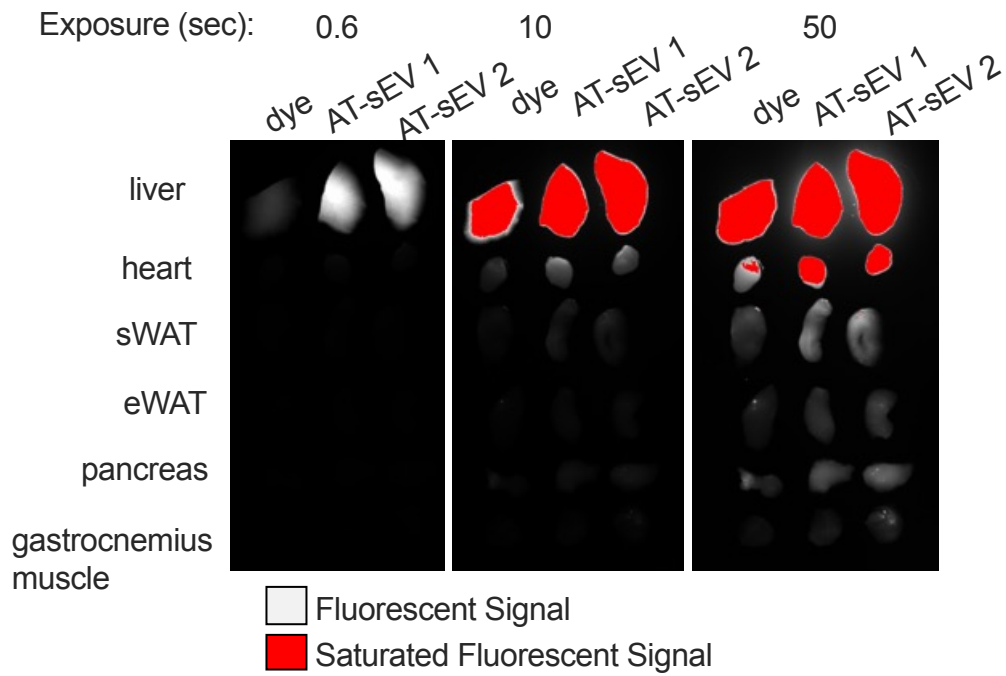

Supplement: Supplementary file 1 [file 1]

Figure S3

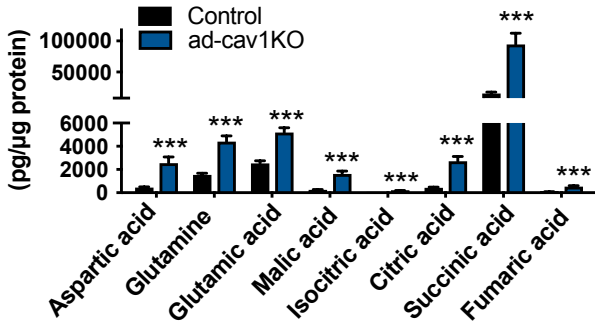

Supplement: Supplementary file 2 [file 1]

Figure S5

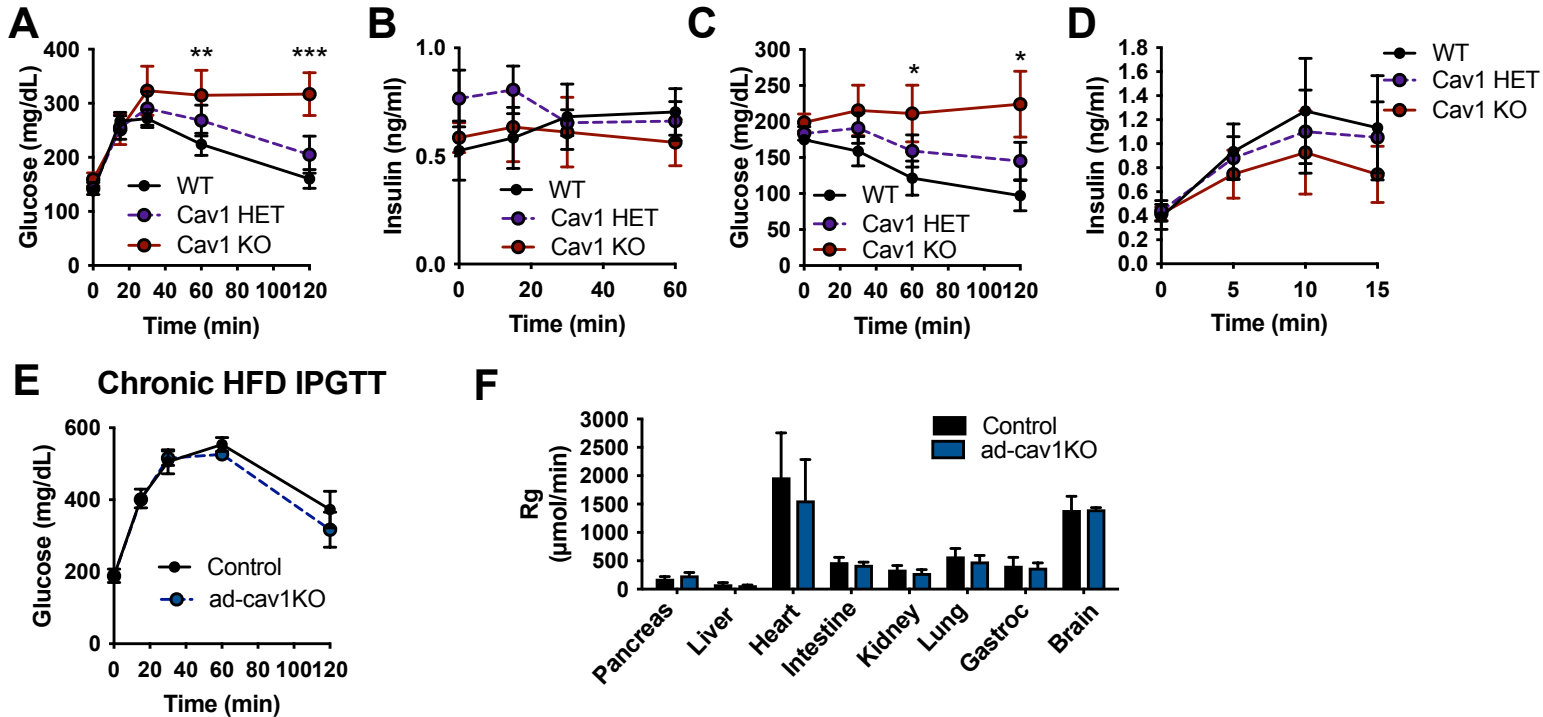

Supplement: Supplementary file 5 [file 1]

Figure S4

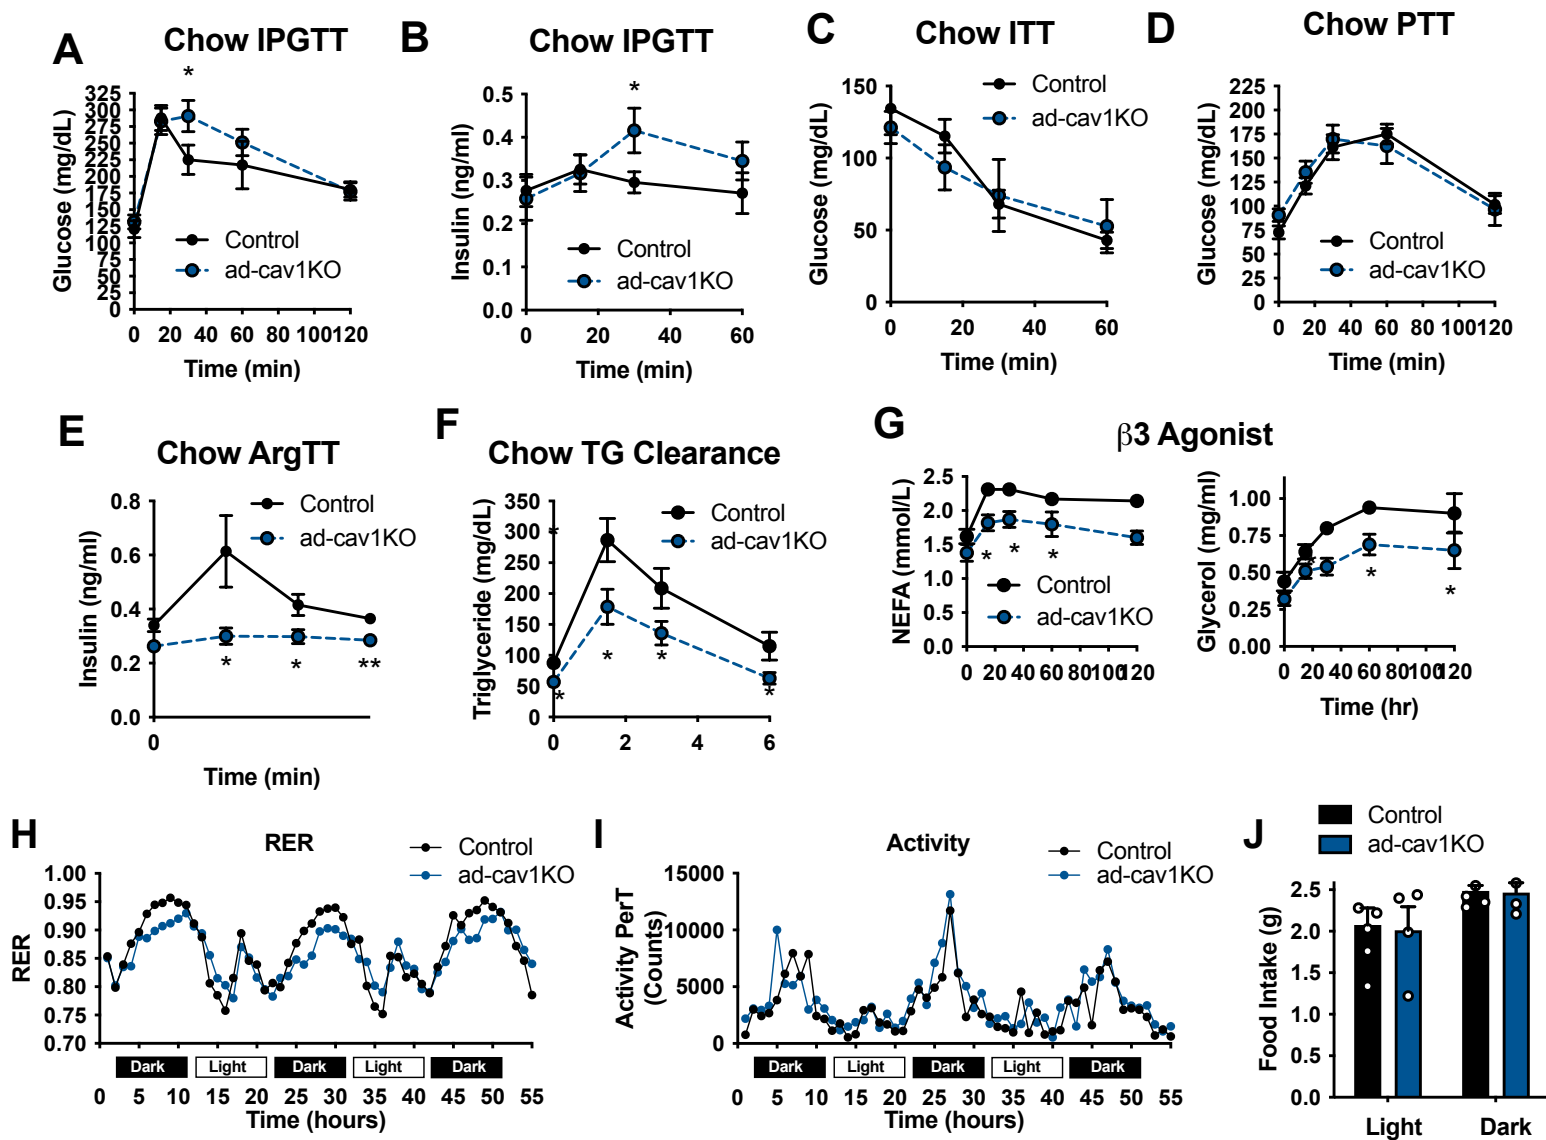

Supplement: Supplementary file 7 [file 1]

Figure S6

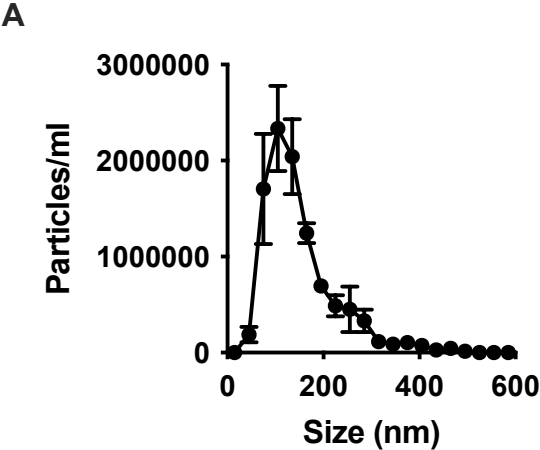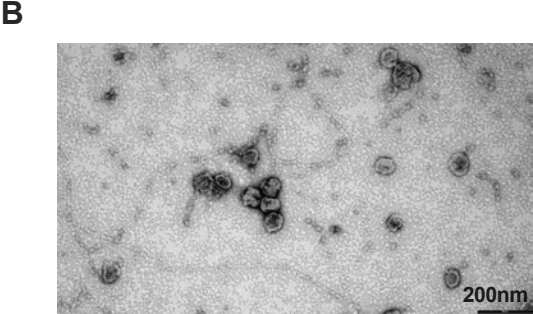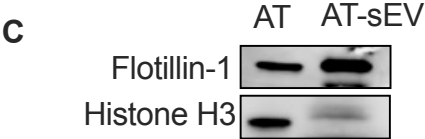

Supplement: Supplementary file 8 [file 1]

Figure S1

**A**

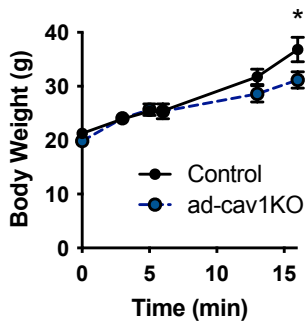

**B**

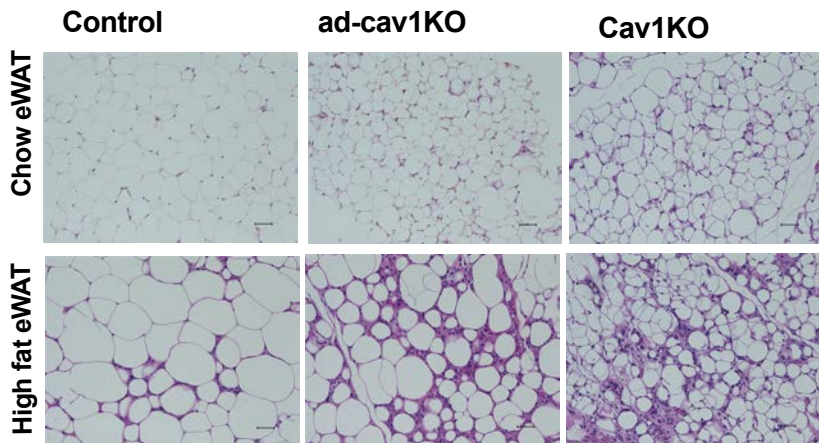

Supplement: Supplementary file 9 [file 1]
